# Supplementary material
Source: PubMed Central journal article supplement (PMC2765994)
Supplement: NIHMS152326-supplement-supporting_information.pdf [file NIHMS152326-supplement-supporting_information.pdf]

Supporting Information for  
**Low Frequency Mode Activity of Heme: Femtosecond Coherence  
Spectroscopy of Iron Porphine Halides and Nitrophorin**

Minoru Kubo<sup>†,§</sup>, Flaviu Gruia<sup>†</sup>, Abdelkrim Benabbas<sup>†</sup>, Alexander Barabanschikov<sup>†</sup>, William R.  
Montfort<sup>‡</sup>, Estelle M. Maes<sup>‡</sup>, and Paul M. Champion<sup>\*,†</sup>

*Department of Physics and Center for Interdisciplinary Research on Complex Systems  
Northeastern University, Boston, MA 02115, and Department of Biochemistry and Molecular  
Biophysics, University of Arizona, Tucson, Arizona 85721*

---

\*Corresponding author: p.champion@neu.edu, Tel. 617-373-2918, Fax. 617-373-2943.

<sup>†</sup>Northeastern University.

<sup>‡</sup>University of Arizona.

<sup>§</sup>Present address: Graduate School of Life Science, University of Hyogo, Hyogo 678-1297,  
Japan.

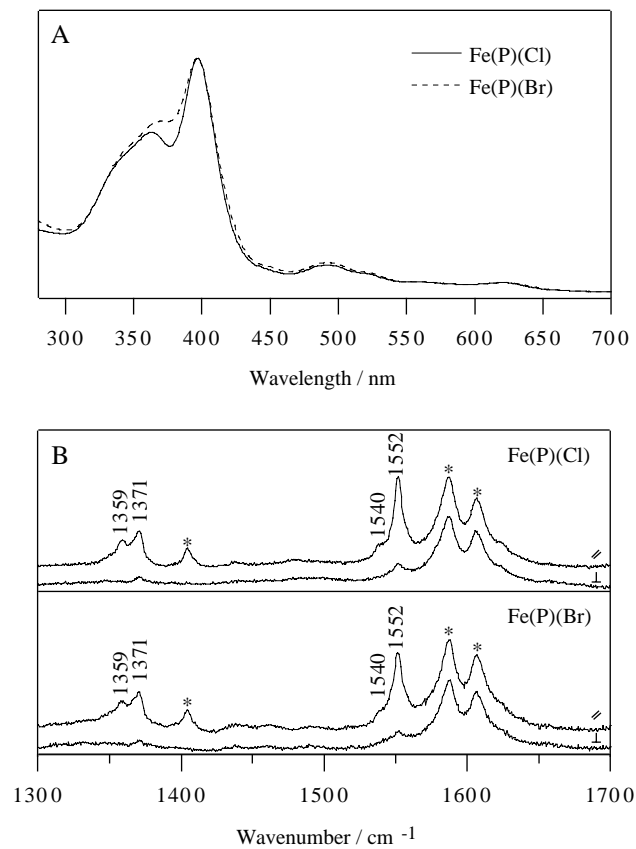

Fig. S1. (A) Absorption spectra and (B) high-frequency polarized Raman spectra of Fe(P)(X). The Raman spectra were measured with excitation at 413.1 nm. Asterisks indicate benzene bands.

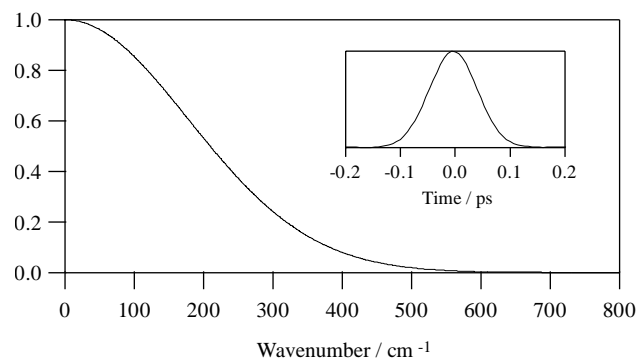

Fig. S2. Fourier transform spectrum of the pulse with a FWHM (full width at half-maximum) of 70 fs. The inset shows a typical autocorrelation trace in the present FCS experiments.

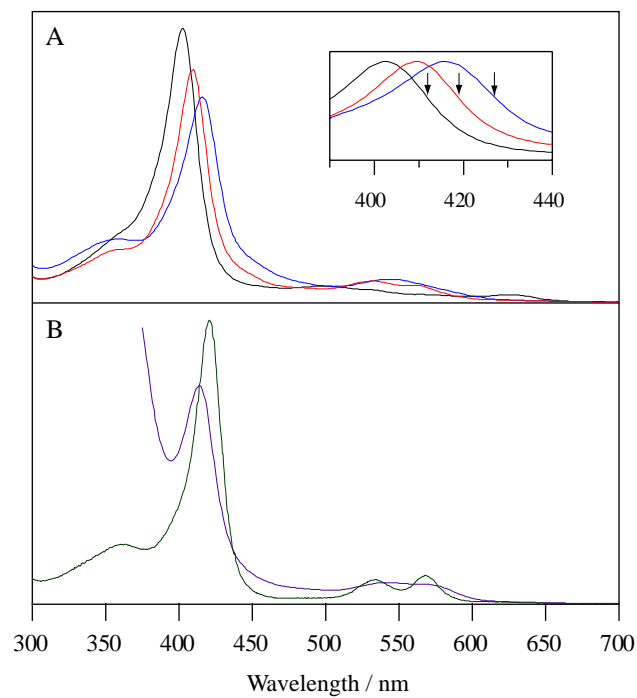

Fig. S3. (A) Absorption spectra of NP4(Fe<sup>3+</sup>)-H<sub>2</sub>O (black), NP4(Fe<sup>3+</sup>)-4IPzH (red), and NP4(Fe<sup>3+</sup>)-CN (blue). The Soret region of each spectrum, normalized at the Soret maximum, is shown in the inset. Arrows indicate the excitation wavelengths used for the FCS measurements. (B) Absorption spectra of NP4(Fe<sup>3+</sup>)-NO (green) and NP4(Fe<sup>2+</sup>)-NO (purple).

Complete ref 52:

52. Frisch, M. J.; Trucks, G. W.; Schlegel, H. B.; Scuseria, G. E.; Robb, M. A.; Cheeseman, J. R.; Montgomery, J., J. A. ; Vreven, T.; Kudin, K. N.; Burant, J. C.; Millam, J. M.; Iyengar, S. S.; Tomasi, J.; Barone, V.; Mennucci, B.; Cossi, M.; Scalmani, G.; Rega, N.; Petersson, G. A.; Nakatsuji, H.; Hada, M.; Ehara, M.; Toyota, K.; Fukuda, R.; Hasegawa, J.; Ishida, M.; Nakajima, T.; Honda, Y.; Kitao, O.; Nakai, H.; Klene, M.; Li, X.; Knox, J. E.; Hratchian, H. P.; Cross, J. B.; Bakken, V.; Adamo, C.; Jaramillo, J.; Gomperts, R.; Stratmann, R. E.; Yazyev, O.; Austin, A. J.; Cammi, R.; Pomelli, C.; Ochterski, J. W.; Ayala, P. Y.; Morokuma, K.; Voth, G. A.; Salvador, P.; Dannenberg, J. J.; Zakrzewski, V. G.; Dapprich, S.; Daniels, A. D.; Strain, M. C.; Farkas, O.; Malick, D. K.; Rabuck, A. D.; Raghavachari, K.; Foresman, J. B.; Ortiz, J. V.; Cui, Q.; Baboul, A. G.; Clifford, S.; Cioslowski, J.; Stefanov, B. B.; Liu, G.; Liashenko, A.; Piskorz, P.; Komaromi, I.; Martin, R. L.; Fox, D. J.; Keith, T.; Al-Laham, M. A.; Peng, C. Y.; Nanayakkara, A.; Challacombe, M.; Gill, P. M. W.; Johnson, B.; Chen, W.; Wong, M. W.; Gonzalez, C.; Pople, J. A., *Gaussian 03*, Revision D.01, Gaussian, Inc., Wallingford, CT, 2004.
